# Supplementary material for: Stromal cells promote anti-estrogen resistance of breast cancer cells through an insulin-like growth factor binding protein 5 (IGFBP5)/B-cell leukemia/lymphoma 3 (Bcl-3) axis
Source: PubMed Central journal article supplement (PMC4770774; doi:10.18632/oncotarget.5624), 2015-10-19
Supplement: oncotarget-06-39307-s001.pdf [file oncotarget-06-39307-s001.pdf]

## SUPPLEMENTARY FIGURE AND TABLES

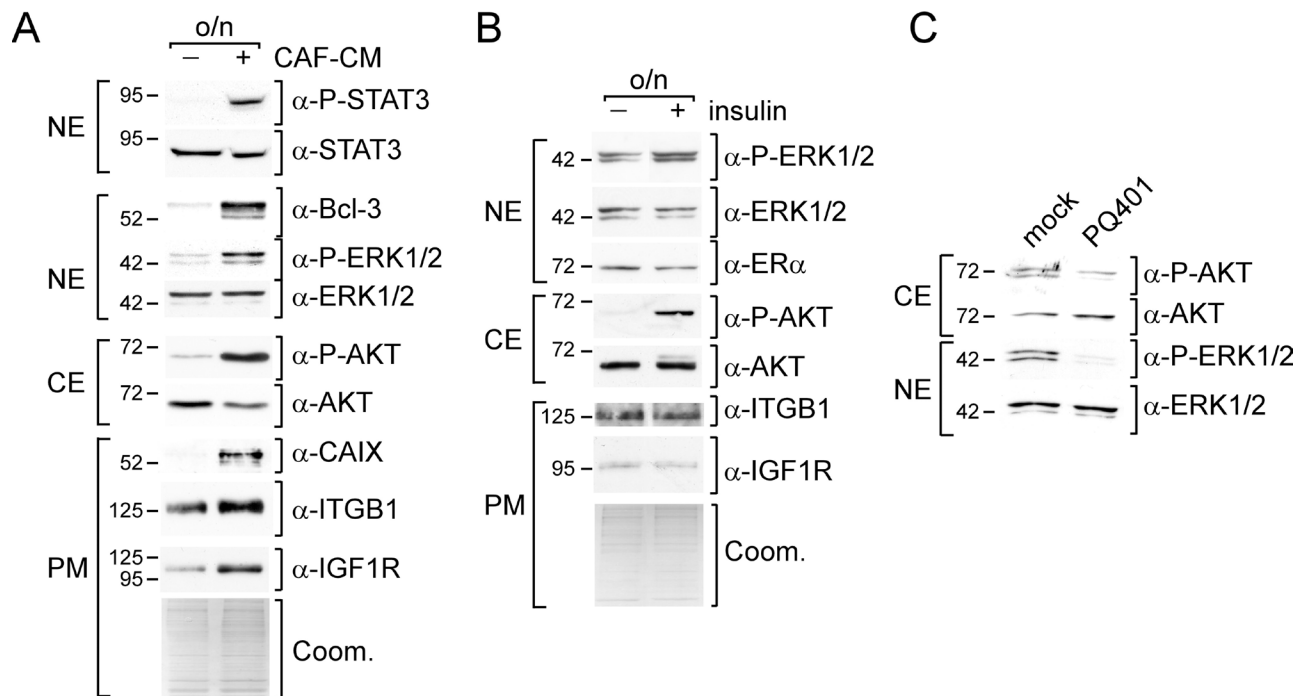

**Supplementary Figure S1: Western blot analyses of proteins and phospho-proteins as indicated.** Overnight incubation of MCF-7 cells with 20% CAF-CM **A**, insulin **B**, or IGF1R inhibitor PQ401 **C**, or none of these agents. CE, NE, PM = cytosolic, nuclear and plasma membrane extract. Coom. = Coomassie Blue stained.

**Supplementary Table S1: Primers for Q-PCR**

| Gene    | Forward primer (5' -> 3') | Reverse primer (5' -> 3')    |
|---------|---------------------------|------------------------------|
| ABCG2   | TGCAACATGTACTGGCGAAGA     | GAGAGATCGATGCCCTGCTT         |
| ACTA2   | GAGTTGCCTGATGGGCAAGT      | GGCAGCGGAAACGTTTCATT         |
| ALDH3A1 | GTCCCTGAGACCACGGAGC       | CCCGTGTACAGGATATGGTCG        |
| BCL3    | GAAGCACATGCACCTACCCA      | GGACTGGTGCCTGAGAATGC         |
| CD44    | CCATTTTGCCCTTCCATAGC      | CAACCCCCAACCTCAGTGG          |
| FGF18   | ACACTTCTCTGCTGTGCTT       | GAAGTCCACGTTCTCCTCGG         |
| FN1     | TGCGAGAGTAAACCTGAAGCTG    | ACCCACTCGGTAAGTGTTCCC        |
| GAPDH   | GAAGGTGAAGGTCGGAGT        | GAAGATGGTGTATGGGATTC         |
| HPRT    | GGACAGGACTGAACGTCTTGC     | TGAGCACACAGAGGGCTACAA        |
| IGF-1   | CTTCTACCTGGCGCTGTGC       | CCATACCCTGTGGGCTTGTT         |
| IGF-2   | GACGTA CTGTGCTACCCCCG     | TTGGAAGAACTTGCCCACG          |
| IGFBP1  | ATTTCCATCTGATGGCCCC       | CGTCCCAAAGGATGGAATGAT        |
| IGFBP2  | GGTTGCAGACAATGGCGAT       | TGGTTCTCCACCAGGCCTC          |
| IGFBP3  | CAGCGCTACAAAGTTGACTACGA   | GAAGTTCTGGGTATCTGTGCTCTG     |
| IGFBP4  | AGCACTTCGCCAAAATTCGA      | TGACCTTCATCTTGCCCCC          |
| IGFBP5  | CCAATTGTGACCGCAAAGG       | CGGGAAGGTTTGCACTGCT          |
| IGFBP6  | CATGGAGCTGTCATCACTCAACA   | TGAAGGTGGATTGAGGGCC          |
| IGFBP7  | AACTGGCTGGGTGCTGGTATC     | TATTCTCCAGCATCTTCCTTACTTAGAG |
| KIF12   | CCCTTCGCGCCTCTTATCT       | GCAAGTCCCGAACCTGCTC          |
| KLHL4   | TGATTGCAGGACACCTCCG       | CTGCGCTGAGAACCAACCTAT        |
| KLK11   | AGCCCCGCTACATAGTTCACC     | CAGCCCTCCTCCTTCTGGA          |
| PROCR   | CGATACTGCTGCTGTCTGGC      | CATCTGAGGCGTCTTGGCTAC        |
| RAB30   | CCTGTGAGGAATCCTTCCGTT     | GTTCTATCTCCCGCAGCCACT        |
| RAMP3   | CATGATGGGCAAGGTGGAC       | ATGAACTCGGACAGGTTGCAC        |
| SEPP1   | CAGGCCTTCATCACCACCAT      | GGTGACCCTGCCTATGCTGA         |
| TGFBR3  | GGCTGTGCAGGAAGAAGCTATC    | TTCCTTGTGTGTGCTGGCAT         |
| TMEM26  | GAGGGTTGCATCAGCTCCA       | CGACTCCCGTCACTCAACAAG        |
| UGT2B15 | GGTCATCCCAAACCAAAGCT      | GATGCCATTGGTTCCACCAT         |
| VIM     | GCAGGAGGCAGAAGAATGGTA     | CAGCCTCAGAGAGGTCAGCAA        |
| YPEL1   | ACACGCCCTCCTGGACAAC       | AGCAACACTGGAAAATGCACG        |

**Supplementary Table S2: Differentially expressed genes (fold change  $\geq 2.0$ ) in MCF-7/MSC co-cultures (50:1) vs. MCF-7 cultures.**
